# Supplementary material for: Stimuli-Responsive and Antibacterial Cellulose-Chitosan Hydrogels Containing Polydiacetylene Nanosheets
Source: MDPI journal article supplement (doi:10.3390/polym15051062), 2023-02-21
Supplement: s1 [file s1]

## Supplementary file PDA-CMCs-HEC hydrogels

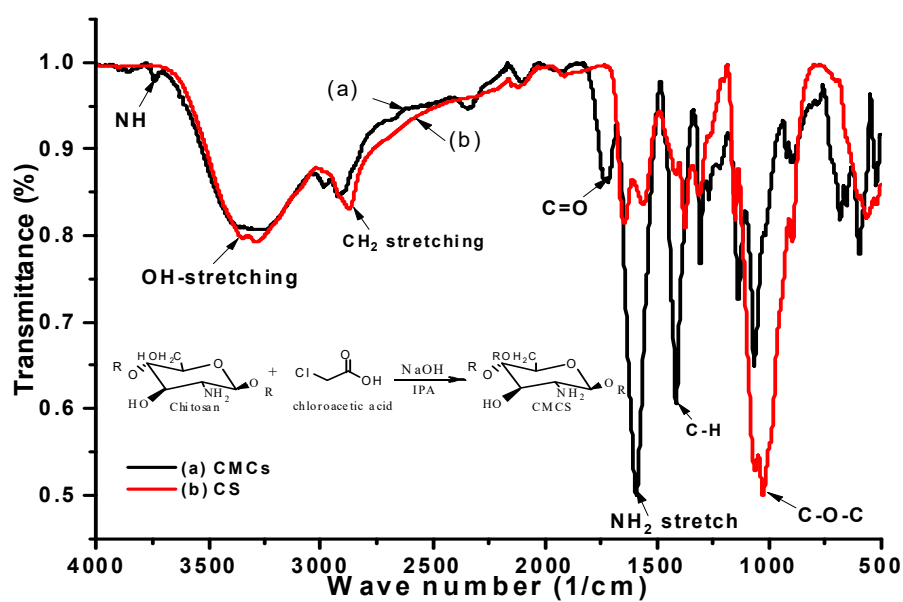

**Figure S1:** IR spectra of (a) chitosan (CS) and (b) carboxymethyl chitosan (RCOOH)

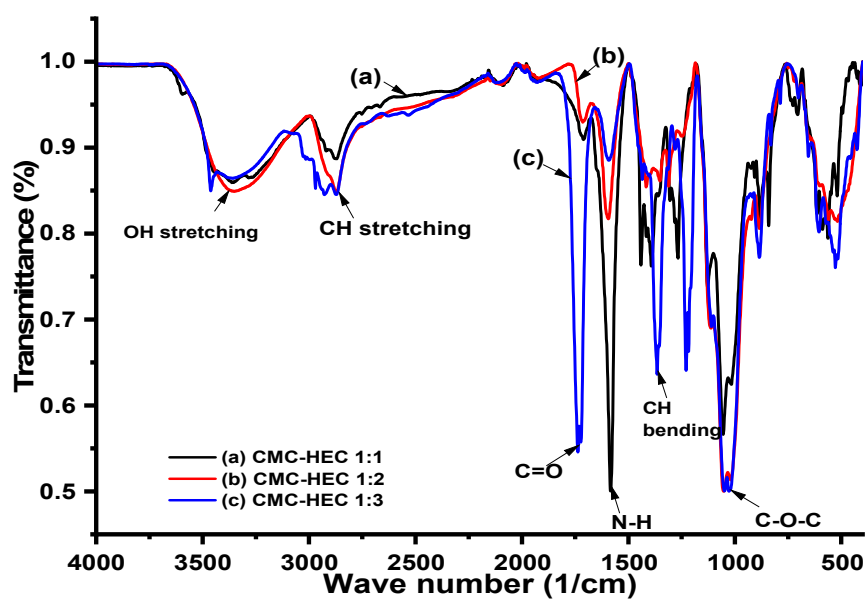

**Figure S2:** IR spectra of hydrogels prepared by crosslinking different ratios of HEC

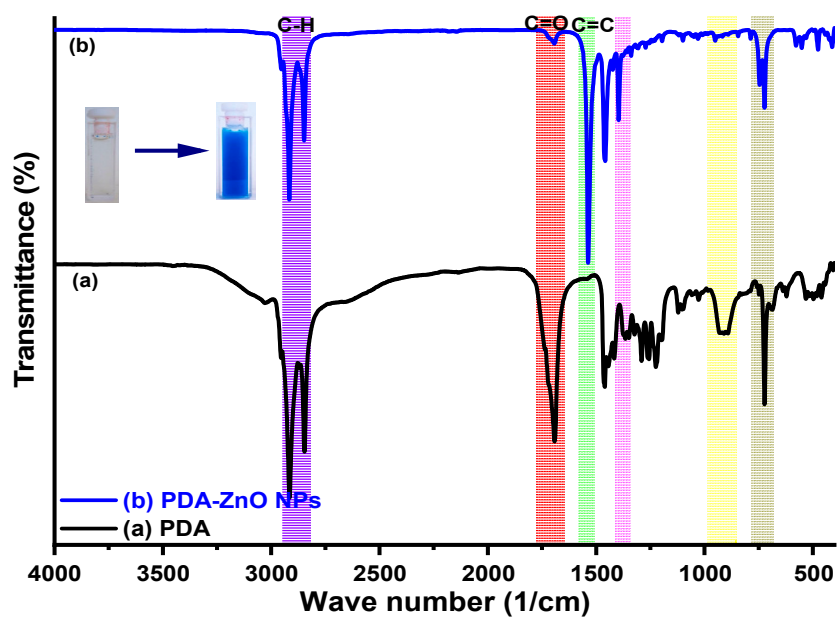

**Figure S3:** IR spectra of (a) PDA and (b) PDA-ZnO NPs

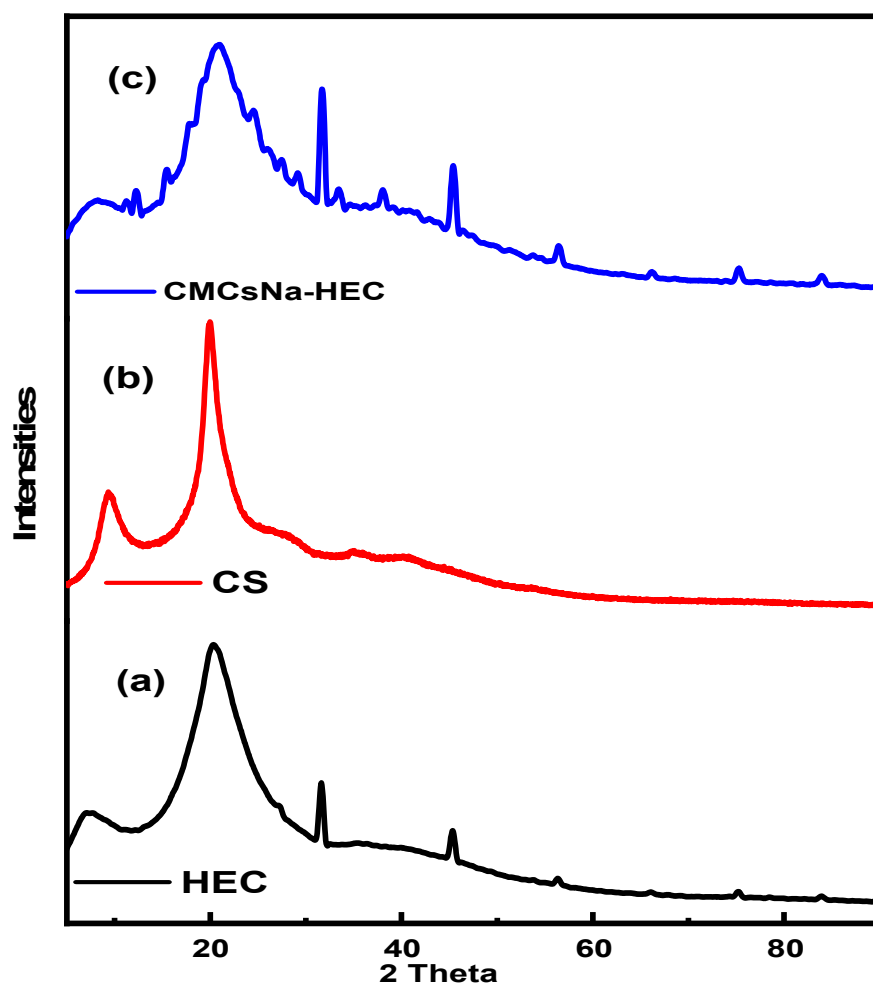

**Figure S4:** X-ray diffractogram of CS, HEC and CMCs-HEC

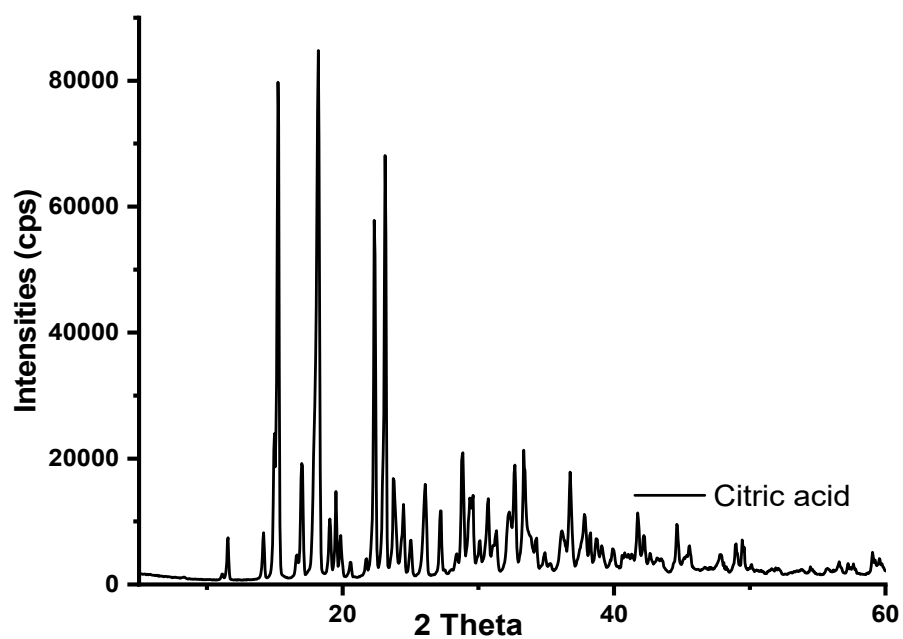

**Figure S5:** X-ray diffractogram of citric acid

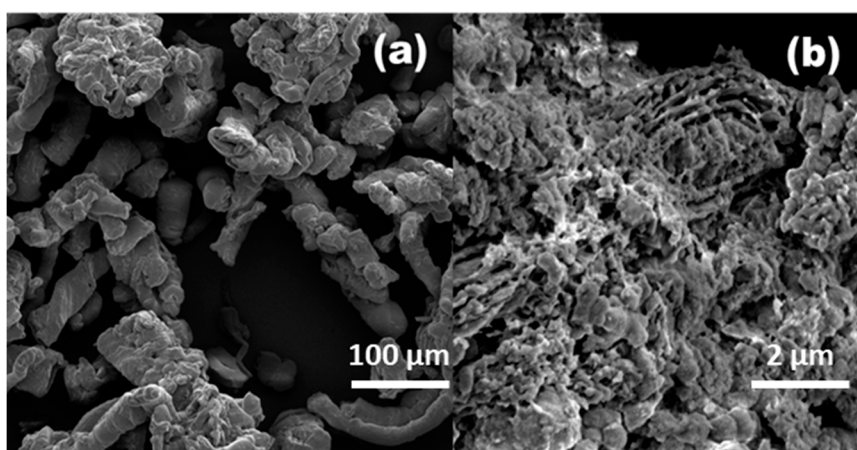

**Figure S6:** SEM Micrographs of (a) HEC and (b) CMCsNa

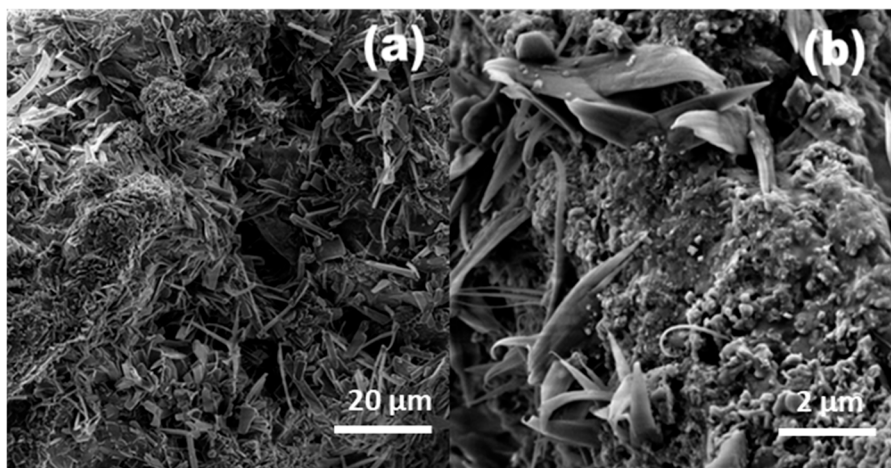

**Figure S7:** SEM Micrographs of PDA nanosheets on PDA-CMCs-ZnO-HEC

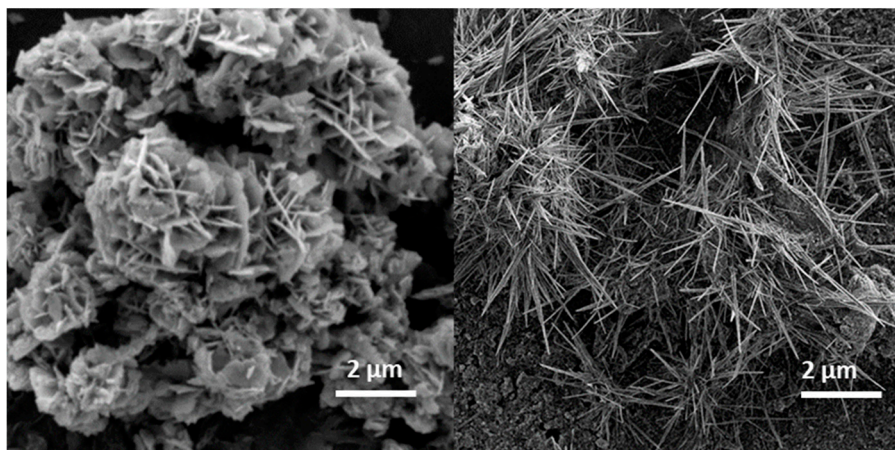

**Figure S8:** SEM micrographs of ZnO nanorods on PDA-ZnO-CMCs-HEC

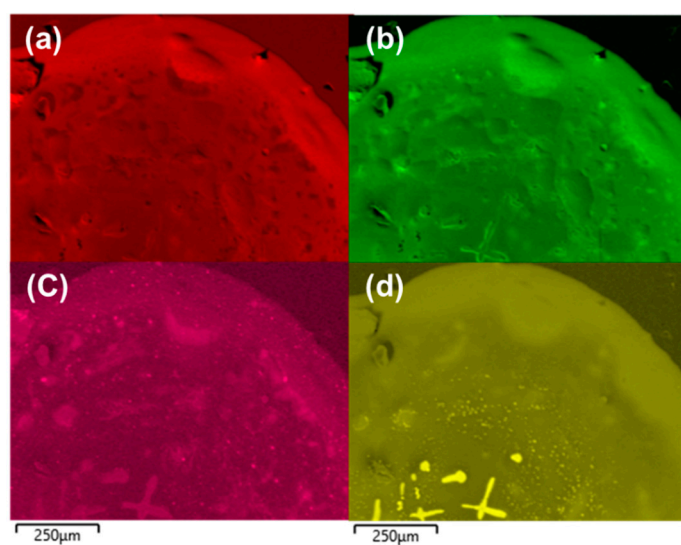

**Figure S9:** Elemental mapping showing (a) carbon (b) oxygen (c) zinc (d) chlorine

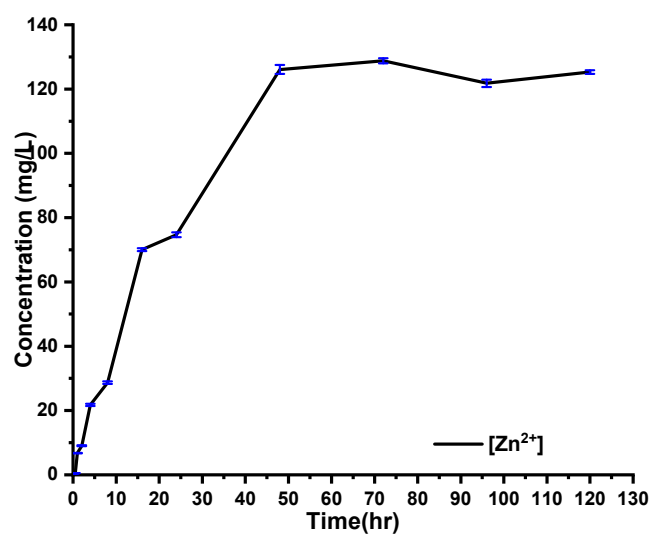

**Figure S10:** Concentration of  $\text{Zn}^{2+}$  ions diffusing from the hydrogels per unit time (h)
